# Supplementary material for: InMAP: A model for air pollution interventions
Source: PubMed Central journal article supplement (PMC5397056; doi:10.1371/journal.pone.0176131), 2017-04-19
Supplement: pone.0176131.s019.pdf [file pone.0176131.s019.pdf]

# InMAP: a model for air pollution interventions: supporting information table 1

Christopher W. Tessum <sup>\*1</sup>, Jason D. Hill <sup>†2</sup>, and Julian D. Marshall <sup>‡1</sup>

<sup>1</sup>University of Washington, Seattle, Washington, USA

<sup>2</sup>University of Minnesota, Minneapolis–St. Paul, Minnesota, USA

Table 1: Names of WRF-Chem Variables used by the InMAP Preprocessor and their Descriptions

| Name(s)                                                               | Description and use in InMAP preprocessor                                                                |
|-----------------------------------------------------------------------|----------------------------------------------------------------------------------------------------------|
| hc5, hc8, olt, oli, tol, xyl, csl, cvasoa1, cvasoa2, cvasoa3, cvasoa4 | Anthropogenic VOCs that are SOA precursors; used to determine VOA/SOA partitioning                       |
| asoa1i, asoa1j, asoa2i, asoa2j, asoa3i, asoa3j, asoa4i, asoa4j        | Anthropogenic SOA; used to determine VOA/SOA partitioning                                                |
| iso, api, sesq, lim, cvbsoa1, cvbsoa2, cvbsoa3, cvbsoa4               | Biogenic VOCs that are SOA precursors; used for model evaluation                                         |
| bsoa1i, bsoa1j, bsoa2i, bsoa2j, bsoa3i, bsoa3j, bsoa4i, bsoa4j        | Biogenic SOA; used for model evaluation                                                                  |
| no, no2                                                               | Components of NO <sub>x</sub> ; used to determine NO <sub>x</sub> /pNO <sub>3</sub> partitioning         |
| no3ai, no3aj                                                          | Components of pNO <sub>3</sub> ; used to determine NO <sub>x</sub> /pNO <sub>3</sub> partitioning        |
| so2, sulf                                                             | Gaseous SO <sub>2</sub> and sulfate; used to determine SO <sub>x</sub> /pSO <sub>4</sub> partitioning    |
| so4ai, so4aj                                                          | Particulate SO <sub>4</sub> ; used to determine SO <sub>x</sub> /pSO <sub>4</sub> partitioning           |
| nh3                                                                   | Ammonia; used to determine NH <sub>3</sub> /pNH <sub>4</sub> partitioning                                |
| nh4ai, nh4aj                                                          | Particulate Ammonium; used to determine NH <sub>3</sub> /pNH <sub>4</sub> partitioning                   |
| PM2.5_DRY                                                             | Total PM <sub>2.5</sub> concentration in the baseline simulation; used for model evaluation              |
| U, V, W                                                               | Wind fields; used to determine advection and mixing coefficients                                         |
| PBLH                                                                  | Planetary boundary layer height; used to determine mixing coefficients                                   |
| PHB, PH                                                               | Base state geopotential and perturbation geopotential; used to calculate layer heights                   |
| HFX                                                                   | Surface heat flux; used to determine mixing and dry deposition                                           |
| UST                                                                   | Friction velocity; used to determine mixing and dry deposition                                           |
| T                                                                     | Temperature; used to calculate chemical reaction rates and plume rise                                    |
| PB, P                                                                 | Base state pressure plus perturbation pressure; used to calculate chemical reaction rates and plume rise |
| ho, h2o2                                                              | Hydroxyl radical and hydrogen peroxide concentrations; used to calculate chemical reaction rates         |
| LU_INDEX                                                              | Land use type; used to calculate mixing                                                                  |
| QRAIN                                                                 | Mixing ratio of rain; used to calculate wet deposition                                                   |
| CLDFRA                                                                | Fraction of grid cell covered by clouds; used to calculate wet deposition                                |
| QCLOUD                                                                | Cloud mixing ratio; used to calculate aqueous-phase chemical reaction rates                              |
| ALT                                                                   | Inverse air density; used to calculate mixing and to convert between mixing ratio and mass concentration |
| SWDOWN, GLW                                                           | Downward shortwave and longwave radiative flux at ground level; used to calculate dry deposition         |

\*ctessum@uw.edu

†hill0408@uw.edu

‡jdmarsh@uw.edu
